# Supplementary material for: A simple spreadsheet-based, MIAME-supportive format for microarray data: MAGE-TAB
Source: Springer Nature journal article supplement (doi:10.1186/1471-2105-7-489), 2006-11-06
Supplement: 12859_2006_1228_MOESM7_ESM.pdf [file 12859_2006_1228_MOESM7_ESM.pdf]

| Block Column | Block Row | Column | Row | Reporter ID | Reporter Sequence | Reporter group | Control Type                     | Composite Element ID |
|--------------|-----------|--------|-----|-------------|-------------------|----------------|----------------------------------|----------------------|
| 1            | 1         | 1      | 1   | R1          | ATGGTTGGTTACGTGT  | experimental   |                                  | PTEN                 |
| 1            | 1         | 1      | 2   | R2          | CCGCGTTGCCCCGCC   | experimental   |                                  | PAX2                 |
| 1            | 1         | 1      | 3   | R3          | CGTAGCTGATCGATGA  | experimental   |                                  | WWOX                 |
| 1            | 1         | 1      | 4   | R4          | GGTTGGCTGAGATCGT  | experimental   |                                  | MAPK8                |
| 1            | 1         | 2      | 1   | R1          | ATGGTTGGTTACGTGT  | experimental   |                                  | PTEN                 |
| 1            | 1         | 2      | 2   | R2          | CCGCGTTGCCCCGCC   | experimental   |                                  | PAX2                 |
| 1            | 1         | 2      | 3   | R3          | CGTAGCTGATCGATGA  | experimental   |                                  | WWOX                 |
| 1            | 1         | 2      | 4   | R4          | GGTTGGCTGAGATCGT  | experimental   |                                  | MAPK8                |
| ...          | ...       | ...    | ... | ...         | ...               | ...            | ...                              | ...                  |
| 4            | 6         | 20     | 20  | 462020      | TCCCTCCGTTGCCT    | control        | <b>control_spike_calibration</b> |                      |

Figure 7
