# Supplementary material for: A simple spreadsheet-based, MIAME-supportive format for microarray data: MAGE-TAB
Source: Springer Nature journal article supplement (doi:10.1186/1471-2105-7-489), 2006-11-06
Supplement: 12859_2006_1228_MOESM9_ESM.pdf [file 12859_2006_1228_MOESM9_ESM.pdf]

| Source ID | Sample ID | Extract ID | LabeledExtract ID     | Label | Hybridization ID |
|-----------|-----------|------------|-----------------------|-------|------------------|
| Source 1a | Sample 1a | Extract 1a | LabeledExtract 1a Cy3 | Cy3   | Hybridization 1  |
| Source 1b | Sample 1b | Extract 1b | LabeledExtract 1b Cy5 | Cy5   | Hybridization 1  |
| Source 1a | Sample 1a | Extract 1a | LabeledExtract 1a Cy5 | Cy5   | Hybridization 2  |
| Source 1b | Sample 1b | Extract 1b | LabeledExtract 1b Cy3 | Cy3   | Hybridization 2  |
| Source 2a | Sample 2a | Extract 2a | LabeledExtract 2a Cy3 | Cy3   | Hybridization 3  |
| Source 2b | Sample 2b | Extract 2b | LabeledExtract 2b Cy5 | Cy5   | Hybridization 3  |
| Source 2a | Sample 2a | Extract 2a | LabeledExtract 2a Cy5 | Cy5   | Hybridization 4  |
| Source 2b | Sample 2b | Extract 2b | LabeledExtract 2b Cy3 | Cy3   | Hybridization 4  |

Figure 9
