# Supplementary material for: A simple spreadsheet-based, MIAME-supportive format for microarray data: MAGE-TAB
Source: Springer Nature journal article supplement (doi:10.1186/1471-2105-7-489), 2006-11-06
Supplement: 12859_2006_1228_MOESM11_ESM.pdf [file 12859_2006_1228_MOESM11_ESM.pdf]

| Source ID  | Sample ID    | Extract ID   | LabeledExtract ID | Label  | Hybridization ID |
|------------|--------------|--------------|-------------------|--------|------------------|
| BS_TKAC_13 | BSM_TKAC_01m | BSM_TKAC_22p | BSM_TKAC_22p      | biotin | HFB2002012101A   |
| BS_TKAC_13 | BSM_TKAC_02m | BSM_TKAC_23p | BSM_TKAC_23p      | biotin | HFB2002012102A   |
| BS_TKAC_13 | BSM_TKAC_03m | BSM_TKAC_24p | BSM_TKAC_24p      | biotin | HFB2002012103A   |
| BS_TKAC_13 | BSM_TKAC_04m | BSM_TKAC_25p | BSM_TKAC_25p      | biotin | HFB2002012104A   |
| BS_TKAC_13 | BSM_TKAC_05m | BSM_TKAC_26p | BSM_TKAC_26p      | biotin | HFB2002012105A   |
| BS_TKAC_13 | BSM_TKAC_06m | BSM_TKAC_27p | BSM_TKAC_27p      | biotin | HFB2002012106A   |
| BS_TKAC_13 | BSM_TKAC_07m | BSM_TKAC_28p | BSM_TKAC_28p      | biotin | HFB2002012107A   |
| BS_TKAC_13 | BSM_TKAC_08m | BSM_TKAC_29p | BSM_TKAC_29p      | biotin | HFB2002012108A   |
| BS_TKAC_13 | BSM_TKAC_09m | BSM_TKAC_30p | BSM_TKAC_30p      | biotin | HFB2002012109A   |
| BS_TKAC_13 | BSM_TKAC_10m | BSM_TKAC_31p | BSM_TKAC_31p      | biotin | HFB2002012110A   |
| BS_TKAC_14 | BSM_TKAC_01n | BSM_TKAC_22p | BSM_TKAC_22p      | biotin | HFB2002012101A   |
| BS_TKAC_14 | BSM_TKAC_02n | BSM_TKAC_23p | BSM_TKAC_23p      | biotin | HFB2002012102A   |
| BS_TKAC_14 | BSM_TKAC_03n | BSM_TKAC_24p | BSM_TKAC_24p      | biotin | HFB2002012103A   |
| BS_TKAC_14 | BSM_TKAC_04n | BSM_TKAC_25p | BSM_TKAC_25p      | biotin | HFB2002012104A   |
| BS_TKAC_14 | BSM_TKAC_05n | BSM_TKAC_26p | BSM_TKAC_26p      | biotin | HFB2002012105A   |
| BS_TKAC_14 | BSM_TKAC_06n | BSM_TKAC_27p | BSM_TKAC_27p      | biotin | HFB2002012106A   |
| BS_TKAC_14 | BSM_TKAC_07n | BSM_TKAC_28p | BSM_TKAC_28p      | biotin | HFB2002012107A   |
| BS_TKAC_14 | BSM_TKAC_08n | BSM_TKAC_29p | BSM_TKAC_29p      | biotin | HFB2002012108A   |
| BS_TKAC_14 | BSM_TKAC_09n | BSM_TKAC_30p | BSM_TKAC_30p      | biotin | HFB2002012109A   |
| BS_TKAC_14 | BSM_TKAC_10n | BSM_TKAC_31p | BSM_TKAC_31p      | biotin | HFB2002012110A   |
| BS_TKAC_15 | BSM_TKAC_01o | BSM_TKAC_22p | BSM_TKAC_22p      | biotin | HFB2002012101A   |
| BS_TKAC_15 | BSM_TKAC_02o | BSM_TKAC_23p | BSM_TKAC_23p      | biotin | HFB2002012102A   |
| BS_TKAC_15 | BSM_TKAC_03o | BSM_TKAC_24p | BSM_TKAC_24p      | biotin | HFB2002012103A   |
| BS_TKAC_15 | BSM_TKAC_04o | BSM_TKAC_25p | BSM_TKAC_25p      | biotin | HFB2002012104A   |
| BS_TKAC_15 | BSM_TKAC_05o | BSM_TKAC_26p | BSM_TKAC_26p      | biotin | HFB2002012105A   |
| BS_TKAC_15 | BSM_TKAC_06o | BSM_TKAC_27p | BSM_TKAC_27p      | biotin | HFB2002012106A   |
| BS_TKAC_15 | BSM_TKAC_07o | BSM_TKAC_28p | BSM_TKAC_28p      | biotin | HFB2002012107A   |
| BS_TKAC_15 | BSM_TKAC_08o | BSM_TKAC_29p | BSM_TKAC_29p      | biotin | HFB2002012108A   |
| BS_TKAC_15 | BSM_TKAC_09o | BSM_TKAC_30p | BSM_TKAC_30p      | biotin | HFB2002012109A   |
| BS_TKAC_15 | BSM_TKAC_10o | BSM_TKAC_31p | BSM_TKAC_31p      | biotin | HFB2002012110A   |
| BS_TKAC_16 | BSM_TKAC_01q | BSM_TKAC_22p | BSM_TKAC_22p      | biotin | HFB2002012101A   |
| BS_TKAC_16 | BSM_TKAC_02q | BSM_TKAC_23p | BSM_TKAC_23p      | biotin | HFB2002012102A   |
| BS_TKAC_16 | BSM_TKAC_03q | BSM_TKAC_24p | BSM_TKAC_24p      | biotin | HFB2002012103A   |
| BS_TKAC_16 | BSM_TKAC_04q | BSM_TKAC_25p | BSM_TKAC_25p      | biotin | HFB2002012104A   |
| BS_TKAC_16 | BSM_TKAC_05q | BSM_TKAC_26p | BSM_TKAC_26p      | biotin | HFB2002012105A   |
| BS_TKAC_16 | BSM_TKAC_06q | BSM_TKAC_27p | BSM_TKAC_27p      | biotin | HFB2002012106A   |
| BS_TKAC_16 | BSM_TKAC_07q | BSM_TKAC_28p | BSM_TKAC_28p      | biotin | HFB2002012107A   |
| BS_TKAC_16 | BSM_TKAC_08q | BSM_TKAC_29p | BSM_TKAC_29p      | biotin | HFB2002012108A   |
| BS_TKAC_16 | BSM_TKAC_09q | BSM_TKAC_30p | BSM_TKAC_30p      | biotin | HFB2002012109A   |
| BS_TKAC_16 | BSM_TKAC_10q | BSM_TKAC_31p | BSM_TKAC_31p      | biotin | HFB2002012110A   |

Figure 11
