# Supplementary material for: A simple spreadsheet-based, MIAME-supportive format for microarray data: MAGE-TAB
Source: Springer Nature journal article supplement (doi:10.1186/1471-2105-7-489), 2006-11-06
Supplement: 12859_2006_1228_MOESM13_ESM.pdf [file 12859_2006_1228_MOESM13_ESM.pdf]

| Source layer | Mid layer | Sink layer |
|--------------|-----------|------------|
| a            | c         | d          |
| b            | c         | e          |

Figure 13
