# Supplementary material for: A simple spreadsheet-based, MIAME-supportive format for microarray data: MAGE-TAB
Source: Springer Nature journal article supplement (doi:10.1186/1471-2105-7-489), 2006-11-06
Supplement: 12859_2006_1228_MOESM14_ESM.pdf [file 12859_2006_1228_MOESM14_ESM.pdf]

(a)

| Sample ID | Characteristics [Organism] | Characteristics [OrganismPart] | Protocol REF | Hybridization ID |
|-----------|----------------------------|--------------------------------|--------------|------------------|
| liver 1   | Homo sapiens               | liver                          | P-XMPL-1     | hyb 1            |
| liver 2   | Homo sapiens               | liver                          | P-XMPL-1     | hyb 1            |
| kidney 1  | Homo sapiens               | kidney                         | P-XMPL-1     | hyb 2            |
| kidney 2  | Homo sapiens               | kidney                         | P-XMPL-1     | hyb 2            |
| brain 1   | Homo sapiens               | brain                          | P-XMPL-1     | hyb 3            |
| brain 2   | Homo sapiens               | brain                          | P-XMPL-1     | hyb 3            |

(b)

| Hybridization ID | ArrayDesign REF | ArrayData URI | Protocol REF | DerivedArrayData Matrix URI |
|------------------|-----------------|---------------|--------------|-----------------------------|
| hyb 1            | HG_U95A         | 1.CEL         | P-XMPL-2     | FGDM.txt                    |
| hyb 2            | HG_U95A         | 2.CEL         | P-XMPL-2     | FGDM.txt                    |
| hyb 3            | HG_U95A         | 3.CEL         | P-XMPL-2     | FGDM.txt                    |

Figure 14
