# Supplementary material for: A simple spreadsheet-based, MIAME-supportive format for microarray data: MAGE-TAB
Source: Springer Nature journal article supplement (doi:10.1186/1471-2105-7-489), 2006-11-06
Supplement: 12859_2006_1228_MOESM15_ESM.pdf [file 12859_2006_1228_MOESM15_ESM.pdf]

| ArrayData REF | 1.cel  | 1.cel   | 2.cel  | 2.cel   | 3.cel  | 3.cel   |
|---------------|--------|---------|--------|---------|--------|---------|
| Reporter REF  | signal | p-value | signal | p-value | signal | p-value |
| Gene 1        | x11    | p11     | x21    | p21     | x31    | p31     |
| Gene 2        | x12    | p12     | x22    | p22     | x32    | p32     |
| Gene 3        | x13    | p13     | x23    | p23     | x33    | p33     |
| ...           | ...    | ...     | ...    | ...     | ...    | ...     |
| Gene n        | x1n    | p1n     | x2n    | p2n     | x3n    | p3n     |

Figure 15
