# Supplementary material for: A simple spreadsheet-based, MIAME-supportive format for microarray data: MAGE-TAB
Source: Springer Nature journal article supplement (doi:10.1186/1471-2105-7-489), 2006-11-06
Supplement: 12859_2006_1228_MOESM16_ESM.pdf [file 12859_2006_1228_MOESM16_ESM.pdf]

| Source ID | Characteristics [CellLine] | Characteristics [CellType] OI:CTO | Characteristics [DiseaseState] OI:nci_meta | Characteristics [Organism] OI:ncbitax | Protocol REF | ParameterValue [Time] | Unit [TimeUnit] OI:MO | Hybridization ID | ArrayDesign REF |
|-----------|----------------------------|-----------------------------------|--------------------------------------------|---------------------------------------|--------------|-----------------------|-----------------------|------------------|-----------------|
| ARP1-0h   | MOLT4                      | T cell                            | acute lymphoblastic leukemia               | Homo sapiens                          | P-XMPL-3     | 0                     | hours                 | H_ARP1-0h        | A-AFFY-33       |
| ARP2-0h   | MOLT4                      | T cell                            | acute lymphoblastic leukemia               | Homo sapiens                          | P-XMPL-3     | 0                     | hours                 | H_ARP2-0h        | A-AFFY-33       |
| ARP3-0h   | MOLT4                      | T cell                            | acute lymphoblastic leukemia               | Homo sapiens                          | P-XMPL-3     | 0                     | hours                 | H_ARP3-0h        | A-AFFY-33       |
| ARP1-2h   | MOLT4                      | T cell                            | acute lymphoblastic leukemia               | Homo sapiens                          | P-XMPL-3     | 2                     | hours                 | H_ARP1-2h        | A-AFFY-33       |
| ARP2-2h   | MOLT4                      | T cell                            | acute lymphoblastic leukemia               | Homo sapiens                          | P-XMPL-3     | 2                     | hours                 | H_ARP2-2h        | A-AFFY-33       |
| ARP3-2h   | MOLT4                      | T cell                            | acute lymphoblastic leukemia               | Homo sapiens                          | P-XMPL-3     | 2                     | hours                 | H_ARP3-2h        | A-AFFY-33       |
| ARP1-4h   | MOLT4                      | T cell                            | acute lymphoblastic leukemia               | Homo sapiens                          | P-XMPL-3     | 4                     | hours                 | H_ARP1-4h        | A-AFFY-33       |
| ARP2-4h   | MOLT4                      | T cell                            | acute lymphoblastic leukemia               | Homo sapiens                          | P-XMPL-3     | 4                     | hours                 | H_ARP2-4h        | A-AFFY-33       |
| ARP3-4h   | MOLT4                      | T cell                            | acute lymphoblastic leukemia               | Homo sapiens                          | P-XMPL-3     | 4                     | hours                 | H_ARP3-4h        | A-AFFY-33       |
| ARP1-6h   | MOLT4                      | T cell                            | acute lymphoblastic leukemia               | Homo sapiens                          | P-XMPL-3     | 6                     | hours                 | H_ARP1-6h        | A-AFFY-33       |
| ARP2-6h   | MOLT4                      | T cell                            | acute lymphoblastic leukemia               | Homo sapiens                          | P-XMPL-3     | 6                     | hours                 | H_ARP2-6h        | A-AFFY-33       |
| ARP3-6h   | MOLT4                      | T cell                            | acute lymphoblastic leukemia               | Homo sapiens                          | P-XMPL-3     | 6                     | hours                 | H_ARP3-6h        | A-AFFY-33       |
| ARP1-8h   | MOLT4                      | T cell                            | acute lymphoblastic leukemia               | Homo sapiens                          | P-XMPL-3     | 8                     | hours                 | H_ARP1-8h        | A-AFFY-33       |
| ARP2-8h   | MOLT4                      | T cell                            | acute lymphoblastic leukemia               | Homo sapiens                          | P-XMPL-3     | 8                     | hours                 | H_ARP2-8h        | A-AFFY-33       |
| ARP3-8h   | MOLT4                      | T cell                            | acute lymphoblastic leukemia               | Homo sapiens                          | P-XMPL-3     | 8                     | hours                 | H_ARP3-8h        | A-AFFY-33       |
| ARP1-10h  | MOLT4                      | T cell                            | acute lymphoblastic leukemia               | Homo sapiens                          | P-XMPL-3     | 10                    | hours                 | H_ARP1-10h       | A-AFFY-33       |
| ARP2-10h  | MOLT4                      | T cell                            | acute lymphoblastic leukemia               | Homo sapiens                          | P-XMPL-3     | 10                    | hours                 | H_ARP2-10h       | A-AFFY-33       |
| ARP3-10h  | MOLT4                      | T cell                            | acute lymphoblastic leukemia               | Homo sapiens                          | P-XMPL-3     | 10                    | hours                 | H_ARP3-10h       | A-AFFY-33       |
| ARP1-12h  | MOLT4                      | T cell                            | acute lymphoblastic leukemia               | Homo sapiens                          | P-XMPL-3     | 12                    | hours                 | H_ARP1-12h       | A-AFFY-33       |
| ARP2-12h  | MOLT4                      | T cell                            | acute lymphoblastic leukemia               | Homo sapiens                          | P-XMPL-3     | 12                    | hours                 | H_ARP2-12h       | A-AFFY-33       |
| ARP3-12h  | MOLT4                      | T cell                            | acute lymphoblastic leukemia               | Homo sapiens                          | P-XMPL-3     | 12                    | hours                 | H_ARP3-12h       | A-AFFY-33       |

Figure 16
